# Supplementary material for: Enhanced metastatic capacity of breast cancer cells after interaction and hybrid formation with mesenchymal stroma/stem cells (MSC)
Source: PubMed Central journal article supplement (PMC5795285; doi:10.1186/s12964-018-0215-4), 2018-01-05

# Isolation of MDA-MSC hybrid cells

5d co-culture of MDA-MB-231<sup>cherry</sup>  
and MSC<sup>GFP</sup>

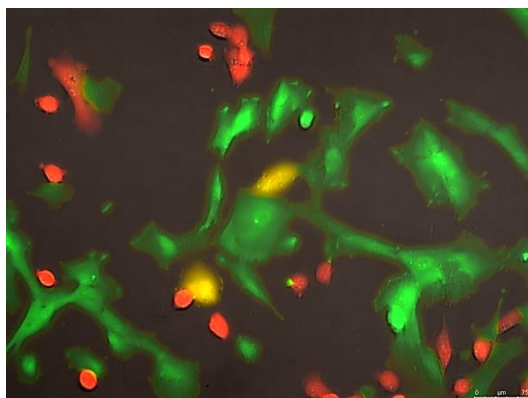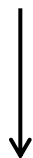

1. sorting

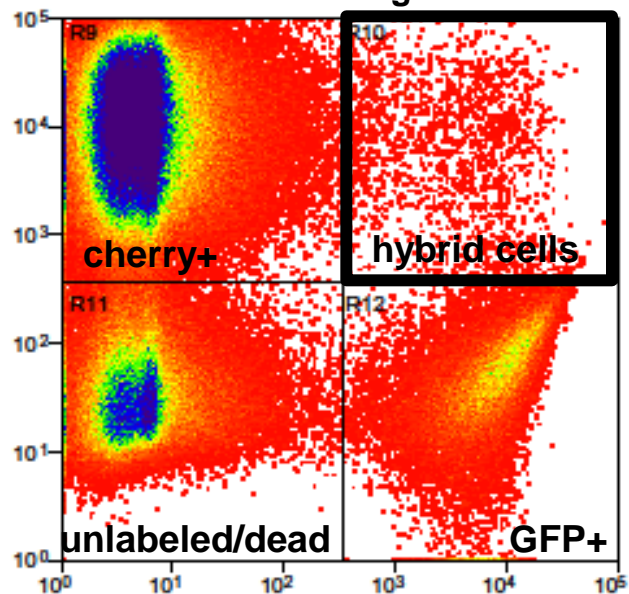

re-sorting of  
cherry/GFP  
hybrid  
population

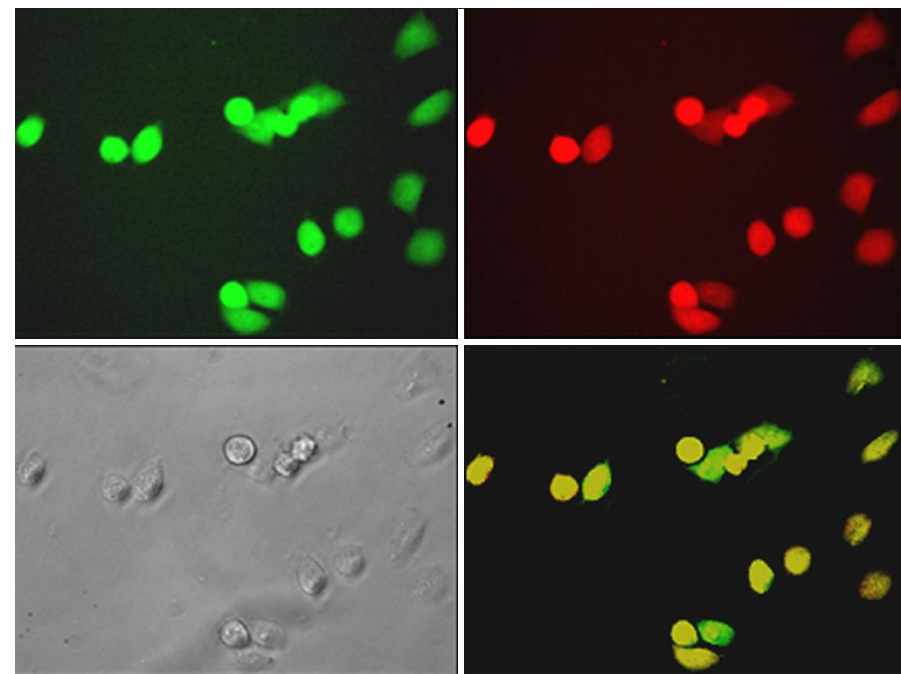

re-culture of 2x sorted  
and single cell-cloned  
hybrid cells

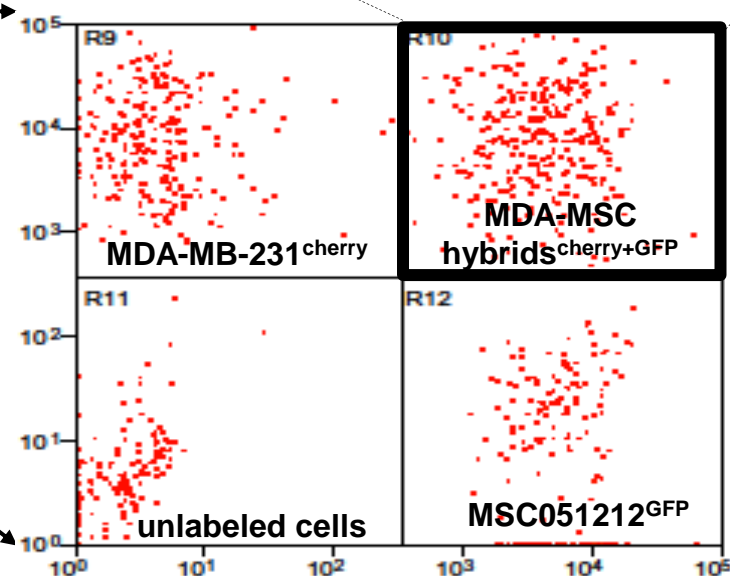

Supplement: 12964_2018_215_MOESM2_ESM.pdf [file 12964_2018_215_MOESM2_ESM.pdf]
