# Supplementary material for: Enhanced metastatic capacity of breast cancer cells after interaction and hybrid formation with mesenchymal stroma/stem cells (MSC)
Source: PubMed Central journal article supplement (PMC5795285; doi:10.1186/s12964-018-0215-4), 2018-01-05

# karyotyping

MDA-MB-231<sup>cherry</sup>

MSC051212<sup>GFP</sup>

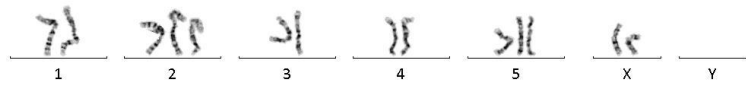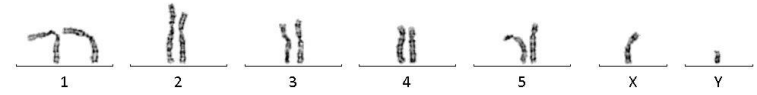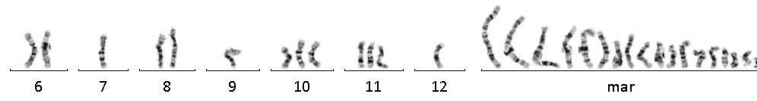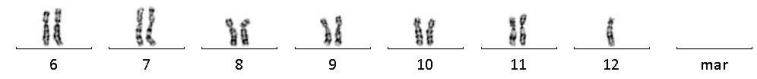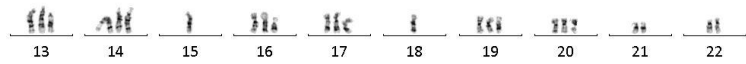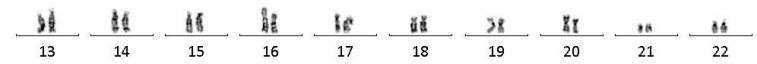

MDA-hyb1

MDA-hyb2

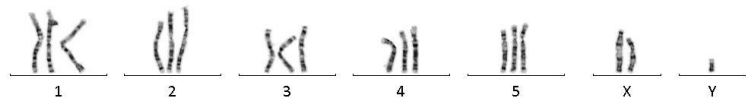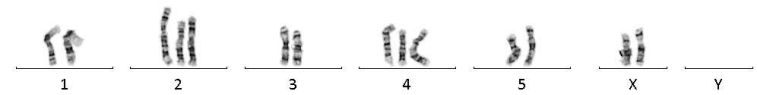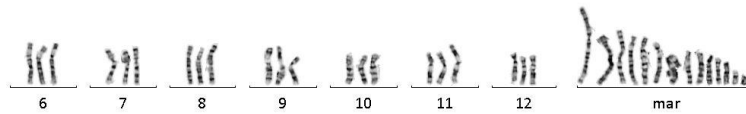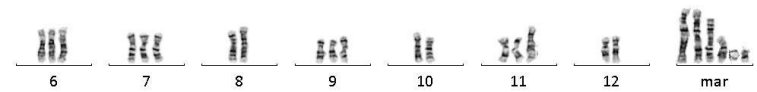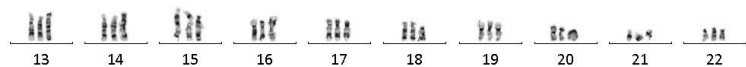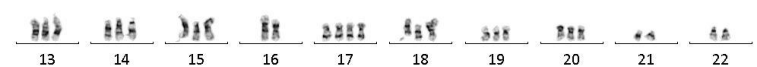

Supplement: 12964_2018_215_MOESM3_ESM.pdf [file 12964_2018_215_MOESM3_ESM.pdf]
