# Supplementary material for: Enhanced metastatic capacity of breast cancer cells after interaction and hybrid formation with mesenchymal stroma/stem cells (MSC)
Source: PubMed Central journal article supplement (PMC5795285; doi:10.1186/s12964-018-0215-4), 2018-01-05

# cell cycle analysis

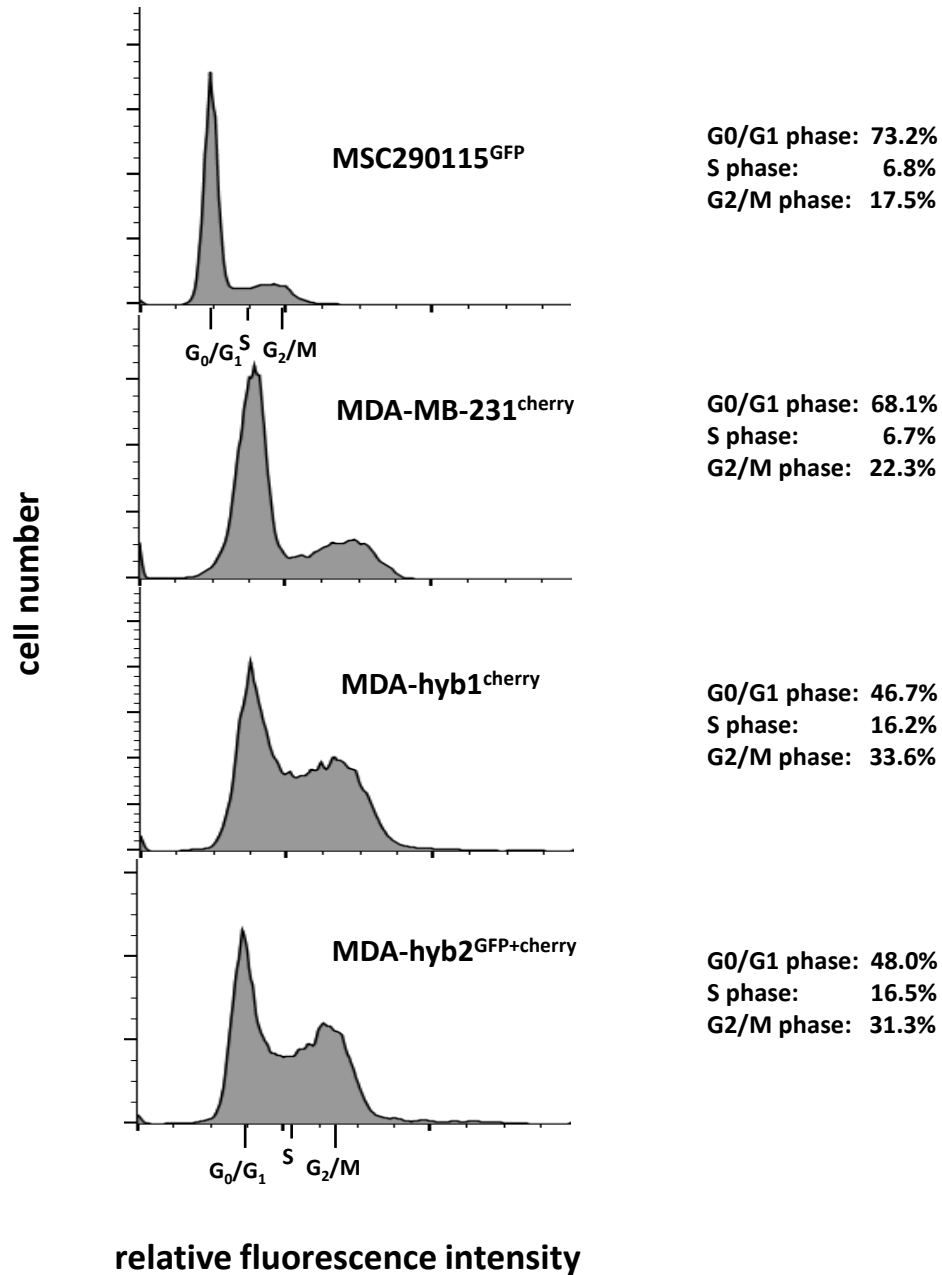

Supplement: 12964_2018_215_MOESM4_ESM.pdf [file 12964_2018_215_MOESM4_ESM.pdf]
